# Supplementary material for: Synthesis of some fluorescent benzimidazole derivatives using cobalt(ii) hydroxide as highly efficient catalyst — spectral and physico-chemical studies and ESIPT process
Source: Royal Society of Chemistry journal article supplement (doi:10.1039/c3pp50083g), 2013-05-10
Supplement: c3pp50083g.pdf [file c3pp50083g.pdf]

**Table S1** Selected Bond lengths (Å), Bond angles (°) and torsional angles (°) of **6**.

| Bond lengths (Å) | Experimental XRD ( Å) | Bond angles (°) | Experimental XRD (°) | Torsional angles (°) | Experimental XRD (°) |
|------------------|-----------------------|-----------------|----------------------|----------------------|----------------------|
| N1-C2            | 1.3760 (1.4974)       | C2-N1-C8        | 106.60 (101.64)      | C8-N1-C2-N3          | -0.83 (17.57)        |
| N1-C8            | 1.3920 (1.4586)       | C2-N1-C11       | 129.56 (113.68)      | C8-N1-C2-C21         | 178.31 (-162.03)     |
| N1-C11           | 1.4400 (1.4700)       | C8-N1-C11       | 121.93 (113.30)      | C11-N1-C2-N3         | -166.19 (139.68)     |
| N3-C2            | 1.3280 (1.3671)       | C2-N3-C9        | 106.46 (105.49)      | C11-N1-C2-C21        | 13.00 (-39.92)       |
| N3-C9            | 1.3790 (1.4604)       | N1-C2-N3        | 111.66 (113.56)      | C2-N1-C8-C7          | -177.06(166.13)      |
| C2-C21           | 1.4600 (1.5400)       | N3-C2-C21       | 121.90 (123.21)      | C2-N1-C8-C9          | 0.64 (-13.73)        |
| C7-C8            | 1.3820 (1.3863)       | N1-C2-C21       | 126.44 (123.23)      | C11-N1-C8-C7         | -10.30 (43.76)       |
| C8-C9            | 1.4040 (1.4769)       | N1-C8-C7        | 131.52 (130.71)      | C11-N1-C8-C9         | 167.36 (-136.10)     |
| C14-C15          | 1.3820 (1.4014)       | N1-C8-C9        | 105.57 (108.28)      | C2-N1-C11-C12        | -124.86 (152.30)     |
| C15-C16          | 1.3920 (1.4014)       | N3-C9-C4        | 131.18 (130.69)      | C2-N1-C11-C16        | 59.40 (-27.70)       |
| C21-C22          | 1.4050 (1.4014)       | N3-C9-C8        | 109.43 (108.25)      | N1-C2-C21-C22        | 19.60 (-0.22)        |
| C24-C25          | 1.3810 (1.4014)       | N1-C11-C12      | 119.43 (120.00)      | N1-C2-C21-C26        | -160.78 (179.78)     |
| C25-C26          | 1.3890 (1.4014)       | N1-C11-C16      | 119.08 (120.00)      | N3-C2-C21-C22        | -161.38 (-179.78)    |
| C26-O26          | 1.3610 (1.4300)       | C21-C26-O26     | 122.24 (120.00)      | N3-C2-C21-C26        | 18.30 (0.22)         |
| O26-H26          | 0.9700 (0.9600)       |                 |                      | C21-C26-O26-H26      | 157.00 (150.00)      |

values within the parenthesis corresponds to theoretical values
